# Supplementary material for: Colchicine Protects against Ethanol-Induced Senescence and Senescence-Associated Secretory Phenotype in Endothelial Cells
Source: MDPI journal article supplement (doi:10.3390/antiox12040960), 2023-04-19
Supplement: s1 [file s1]

**Table S1.** Primary and Secondary antibodies

| Antibody                                                                                             | MW(kDa) | Brand          | Catalog Number    | Concentration |
|------------------------------------------------------------------------------------------------------|---------|----------------|-------------------|---------------|
| P21                                                                                                  | 21      | Cell Signaling | # 2947S           | 1:1,000       |
| KU70                                                                                                 | 70      | Cell Signaling | #4588S            | 1:1,000       |
| KU80                                                                                                 | 86      | Cell Signaling | #2753S            | 1:1,000       |
| P65                                                                                                  | 65      | Abcam          | ab16502           | 1:1,000       |
| p-P65                                                                                                | 65      | Cell Signaling | #3033S            | 1:1,000       |
| MMP-2                                                                                                | 70      | Invitrogen     | 436000            | 2 µg/mL       |
| β-actin                                                                                              | 45      | Cell Signaling | #4970S            | 1:1,000       |
| α-Tubulin                                                                                            | 50      | Sigma Aldrich  | #T9026            | 1:500         |
| p-P38                                                                                                | 43      | Cell Signaling | #4511S            | 1:1,000       |
| p-JNK                                                                                                | 46,54   | Cell Signaling | #9255S            | 1:2,000       |
| p-ERK                                                                                                | 42,44   | Cell Signaling | #4370S            | 1:2,000       |
| 8-OHDG                                                                                               |         | BIOSS          | BSS-BS-1278R      | 1:500         |
| Alexa Fluor Plus 488<br>Excitation: 495 nm<br>Emission: 519 nm                                       |         | Thermo Fisher  | A48269            | 1:1000        |
| IRDye 800CW Goat-<br>anti-Rabbit Antibody<br>Excitation: 778 nm<br>Emission: 795 nm                  |         | LiCor          | # LI-COR 92632211 | 1:10,000      |
| IRDye 680RD Donkey<br>anti-Mouse IgG<br>Secondary Antibody<br>Excitation: 676 nm<br>Emission: 694 nm |         | LiCor          | 926-68072         | 1:10,000      |

**Table S2.** Primer list

| Target gene   | Gene Accession Number                                                         | Sense 5' -3'            | Antisense 5' -3'         |
|---------------|-------------------------------------------------------------------------------|-------------------------|--------------------------|
| ICAM-1        | NM_000201                                                                     | CACAGTCACCTATGGCAACGA   | TGGCTTCGTCAGAATCACGTT    |
| VCAM-1        | NM_080682,<br>NM_001199834,<br>NM_001078                                      | AGTGGTGGCCTCCTGAATGG    | CTGTGTCTCCTGTCTCCGCT     |
| IL-8          | NM_001354840,<br>NM_000584                                                    | TGCCAAGGAGTGCTAAAG      | CTCCACAACCCTCTGCAC       |
| MCP-1         | NM_002982                                                                     | CACCAATAGGAAGATCTCAGTGC | TGAGTGTTCAAGTCTTCGGAGTT  |
| MMP1          | NM_001145938,<br>NM_002421                                                    | CAGAGATGAAGTCCGGTTTTTC  | GGGGTATCCGTGTAGCACAT     |
| MMP2          | NM_001302510,<br>NM_001302509,<br>NM_001127891,<br>NM_004530,<br>NM_001302508 | ATAACCTGGATGCCGTCGT     | AGGCACCCTTGAAGAAGTAGC    |
| MMP10         | NM_002425                                                                     | CACAGTTTGGCTCATGCCTA    | TGCCATTACATCATCTTGC      |
| MMP11         | NM_005940                                                                     | CCGCAACCGACAGAAGAGG     | ATCGCTCCATACCTTTAGGGC    |
| TIMP1         | NM_003254                                                                     | TGGCTTCTGGCATCCTGTTGTTG | CGCTGGTATAAGGTGGTCTGGTTG |
| TIMP2         | NM_003255                                                                     | GAATCGGTGAGGTCCTGTCCTGA | CCTGCACACAAGCCCGGATAAA   |
| IL-1 $\beta$  | NM_000576                                                                     | AGATGATAAGCCCACTCTACAG  | ACATTCAGCACAGGACTCTC     |
| E-selectin    | NM_000450                                                                     | CAAGAAGAAGCTTGCCCTATG   | ACTTGAGTCCACTGAAGCCA     |
| TNF- $\alpha$ | NM_000594                                                                     | CCCGAGTGACAAGCCTGTAG    | GATGGCAGAGAGGAGGTTGAC    |
| IL-6          | NM_001371096<br>NM_001318095<br>XM_011515391<br>NM_000600                     | CTGCAGGACATGACAACCTCATC | ATCTGAGGTGCCCATGCTAC     |
